# Supplementary material for: Impact of ANCA-Associated Vasculitis on Outcomes of Hospitalizations for Goodpasture’s Syndrome in the United States: Nationwide Inpatient Sample 2003–2014
Source: PubMed Central journal article supplement (PMC7142422; doi:10.3390/medicina56030103), 2020-03-01
Supplement: medicina-56-00103-s001.pdf [file medicina-56-00103-s001.pdf]

Table S1 ICD-9 code for treatments and outcomes

|                | Description                                                                                                                                                                 | ICD-9CM                                                                                                                                                |
|----------------|-----------------------------------------------------------------------------------------------------------------------------------------------------------------------------|--------------------------------------------------------------------------------------------------------------------------------------------------------|
| Organ Failure  |                                                                                                                                                                             |                                                                                                                                                        |
| Respiratory    | Acute respiratory failure                                                                                                                                                   | 518.81                                                                                                                                                 |
|                | Other pulmonary insufficiency, not elsewhere classified.<br>Includes - acute respiratory distress, acute respiratory insufficiency, adult respiratory distress syndrome NEC | 518.82                                                                                                                                                 |
|                | Acute respiratory distress syndrome after shock or trauma                                                                                                                   | 518.85                                                                                                                                                 |
|                | Respiratory distress NOS                                                                                                                                                    | 786.09                                                                                                                                                 |
|                | Respiratory arrest                                                                                                                                                          | 799.1                                                                                                                                                  |
|                | Ventilator management                                                                                                                                                       | 96.7, 96.70, 96.71, 96.72                                                                                                                              |
| Cardiovascular | Shock without mention of trauma                                                                                                                                             | 785.5                                                                                                                                                  |
|                | Shock unspecified                                                                                                                                                           | 785.50                                                                                                                                                 |
|                | Other shock without trauma (includes hypovolemic Shock)                                                                                                                     | 785.59                                                                                                                                                 |
|                | Cardiogenic shock                                                                                                                                                           | 785.51                                                                                                                                                 |
|                | Septic shock                                                                                                                                                                | 785.52                                                                                                                                                 |
|                | Hypotension NOS                                                                                                                                                             | 458.8, 458.9, 796.3                                                                                                                                    |
| Renal          | Acute kidney injury                                                                                                                                                         | 584, 584.5, 584.6, 584.7, 584.8, 584.9                                                                                                                 |
| Hepatic        | Acute hepatic failure or necrosis                                                                                                                                           | 570                                                                                                                                                    |
|                | Hepatic encephalopathy                                                                                                                                                      | 572.2                                                                                                                                                  |
|                | Hepatitis unspecified                                                                                                                                                       | 573.3                                                                                                                                                  |
|                | Hepatic infarction                                                                                                                                                          | 573.4                                                                                                                                                  |
| Hematologic    | Defibrination syndrome                                                                                                                                                      | 286.6                                                                                                                                                  |
|                | Acquired coagulation factor deficiency                                                                                                                                      | 286.7                                                                                                                                                  |
|                | Other coagulation defect                                                                                                                                                    | 286.9                                                                                                                                                  |
|                | Thrombocytopenia - secondary or unspecified                                                                                                                                 | 287.49, 287.5                                                                                                                                          |
| Metabolic      | Acidosis – metabolic or lactic                                                                                                                                              | 276.2                                                                                                                                                  |
| Neurologic     | Transient organic psychotic conditions                                                                                                                                      | 293, 293.0, 293.1, 293.8, 293.81, 293.82, 293.83, 293.84, 293.89, 293.9                                                                                |
|                | Anoxic brain injury                                                                                                                                                         | 348.1                                                                                                                                                  |
|                | Acute encephalopathy                                                                                                                                                        | 348.3, 348.30, 348.31, 348.39                                                                                                                          |
|                | Coma                                                                                                                                                                        | 780.01                                                                                                                                                 |
|                | Altered consciousness - unspecified                                                                                                                                         | 780.09                                                                                                                                                 |
|                | Electroencephalogram                                                                                                                                                        | 89.14                                                                                                                                                  |
| Sepsis         | Sepsis                                                                                                                                                                      | 038.0, 038.10, 038.11, 038.19, 038.2, 038.3, 038.4, 038.40, 038.41, 038.42, 038.43, 038.44, 038.49, 038.8, 038.9, 790.7, 117.9, 112.5, 115.04, 115.14, |

|                                     |  |                                                                                                                                 |
|-------------------------------------|--|---------------------------------------------------------------------------------------------------------------------------------|
|                                     |  | 115.94, 112.81, 112.83, 003.1, 003.21, 036.2, 036.3, 036.0, 036.1, 036.42, 020.2, 022.3, 098.89, 098.84, 098.82, 995.92, 785.52 |
| Procedure                           |  |                                                                                                                                 |
| Plasmapheresis                      |  | 99.71, 99.76, 99.79                                                                                                             |
| Invasive mechanical ventilation     |  | 96.7, 96.70, 96.71, 96.72                                                                                                       |
| Non-invasive mechanical ventilation |  | 93.90                                                                                                                           |
| Renal replacement therapy           |  | 39.95, 54.98                                                                                                                    |
